# Supplementary material
Source: publisher site journal article supplement (https://www.dovepress.com/article/219862)
Supplement: Supplementary file 1 [file get_supplementary_file.php]

# Appendix 1

The study was run according to ISO 14155 and the Declaration of Helsinki. The following institutional review boards oversaw the conduct of the study:

| **Site name** | **Governing IRB** |
| --- | --- |
| Columbia Orthopedics | Boone Hospital Center IRB |
| Medical University of South Carolina | Institutional Review Board for Human Research (IRB) and Office of Research Integrity (ORI) at Medical University of South Carolina |
| Precision Spine Care | Western IRB |
| OrthoSpine Solutions | Western IRB |
| Oklahoma Center for Spine & Pain Solutions | Western IRB |
| Integrated Spine Care | Ascension Wisconsin- Wheaton Franciscan IRB |
| Yale University | Yale University IRB |
| Orthopaedic Center of Southern Illinois | Western IRB |
| BayCare Clinic Orthopedics & Sports Medicine | Western IRB |
| Bluegrass Orthopedics | Western IRB |
| Allegheny General Hospital | Western IRB |
| Overlake Medical Center | Western IRB |
